# Supplementary material for: Forming SnS@C/MoS2 nanotubes with high specific surface area via self-sacrificing template method as superior performance anode for lithium-ion batteries
Source: Royal Society of Chemistry journal article supplement (doi:10.1039/d3ce01276j), 2024-01-01
Supplement: d3ce01276j1.pdf [file d3ce01276j1.pdf]

# **Forming SnS@C/MoS<sub>2</sub> Nanotubes with High Specific Surface Area via Self Sacrificing Template Method as Superior Performance Anode for Lithium-Ion Batteries**

Songwei Ye<sup>1</sup>, Zunxian Yang<sup>\*,1,2</sup>, Yuliang Ye<sup>1</sup>, Zhiming Cheng<sup>1</sup>, Hongyi Hong<sup>1</sup>, Zhiwei Zeng<sup>1</sup>, Zongyi Meng<sup>1</sup>, Qianting Lan<sup>1</sup>, Hui Zhang<sup>1</sup>, Ye Chen<sup>1</sup>, Jiaxiang Wang<sup>1</sup>, Yuting Bai<sup>1</sup>, Xudong Jiang<sup>1</sup>, Benfang Liu<sup>1</sup>, Jiajie Hong<sup>1</sup>, Tailiang Guo<sup>1,2</sup>, Shen Xu<sup>1,2</sup>, Zhenzhen Weng<sup>3</sup>, Yongyi Chen<sup>3</sup>

<sup>1</sup>National & Local United Engineering Research Center of Flat Panel Display Technology, Fuzhou University, Fuzhou 350108, P. R. China.

<sup>2</sup>Mindu Innovation Laboratory, Fujian Science & Technology Innovation Laboratory For Optoelectronic Information of China, Fuzhou, 350108, P.R. China

<sup>3</sup>Department of Physics, School of Physics and Information Engineering, Fuzhou University

## **Supporting Information**

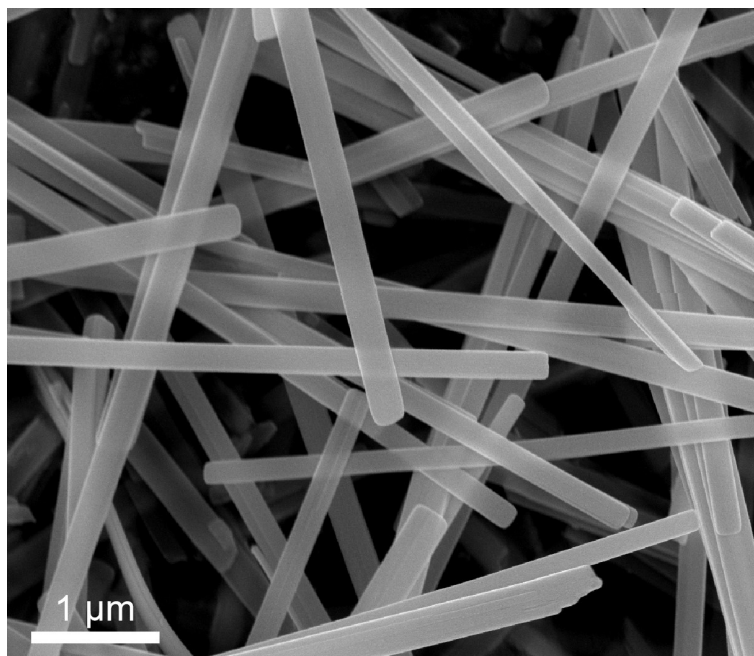

**Figure S1** SEM images of MoO<sub>3</sub> nanobelts

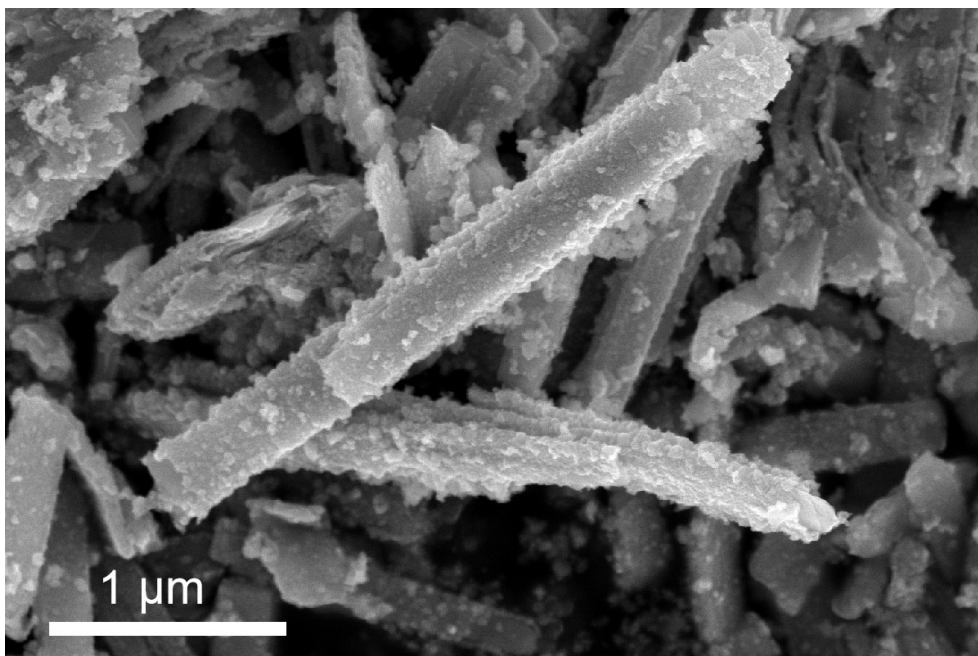

**Figure S2** SEM images of Sn-MOF/MoO<sub>3</sub> nanorod without PVP

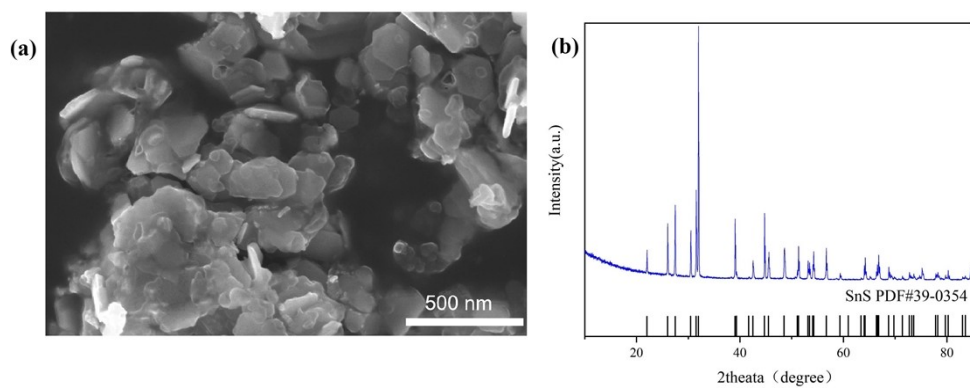

**Figure S3 (a) SEM image and (b) XRD pattern of C/SnS nanosheets.**

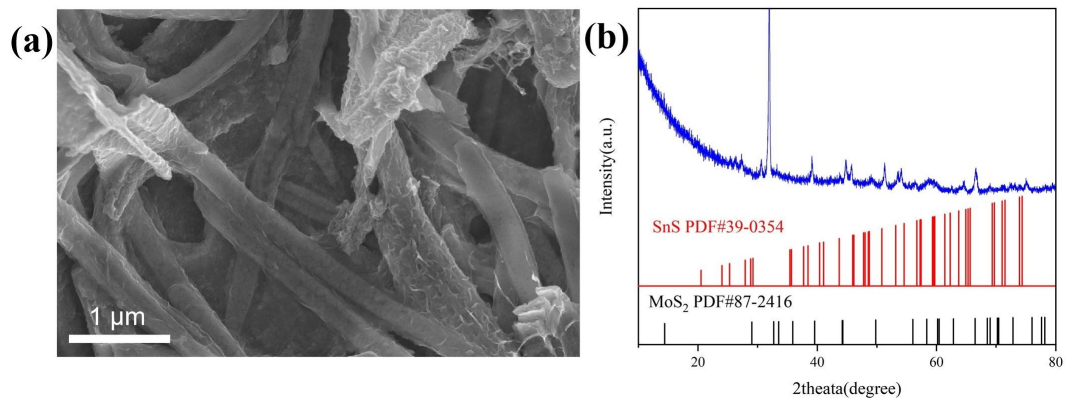

**Figure S4 (a)** SEM image and **(b)** XRD pattern of SnS/MoS<sub>2</sub> nanotubes.

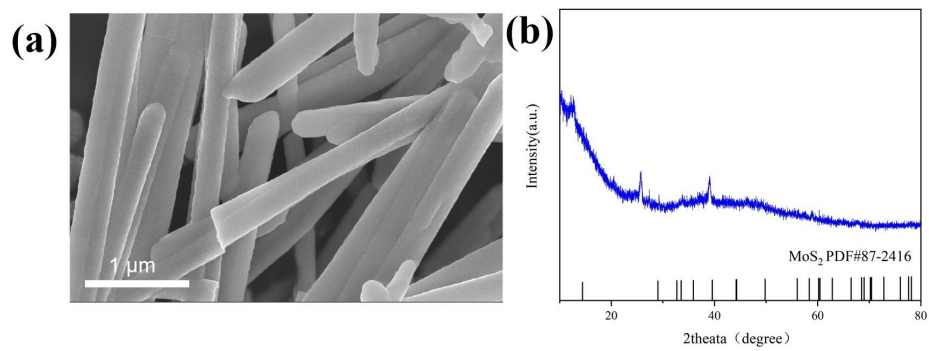

**Figure S5 (a)** SEM image and **(b)** XRD pattern of MoS<sub>2</sub> nanorods.
